# Supplementary material
Source: PubMed Central journal article supplement (PMC7226674)
Supplement: NIHMS1582937-supplement-1.pdf [file NIHMS1582937-supplement-1.pdf]

**Cell Reports, Volume 31**

**Supplemental Information**

**Passenger Mutations Confound Phenotypes  
of SARM1-Deficient Mice**

**Melissa B. Uccellini, Susana V. Bardina, Maria Teresa Sánchez-Aparicio, Kris M. White, Ying-Ju Hou, Jean K. Lim, and Adolfo García-Sastre**

**Figure S1. Knockdown experiments, Related to Figure 3.**

**A**

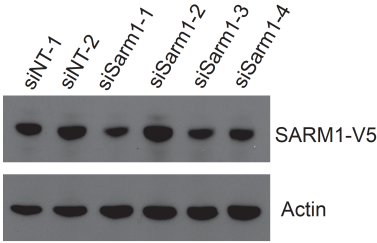

**B**

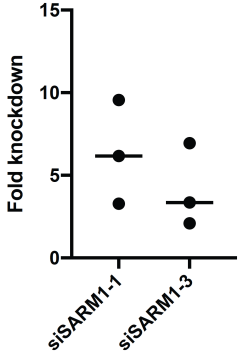

(A) Full western blot images for Figure 4C. (B) Fold knockdown of siRNAs compared to the average of siNT-1 and siNT-2 from 3 separate experiments.

**Figure S2. *Sarm1* CRISPR alleles and absence of off-target CRISPR-mediated cleavage in *Sarm1*<sup>AGS3</sup> mice, Related to Figure 4.**

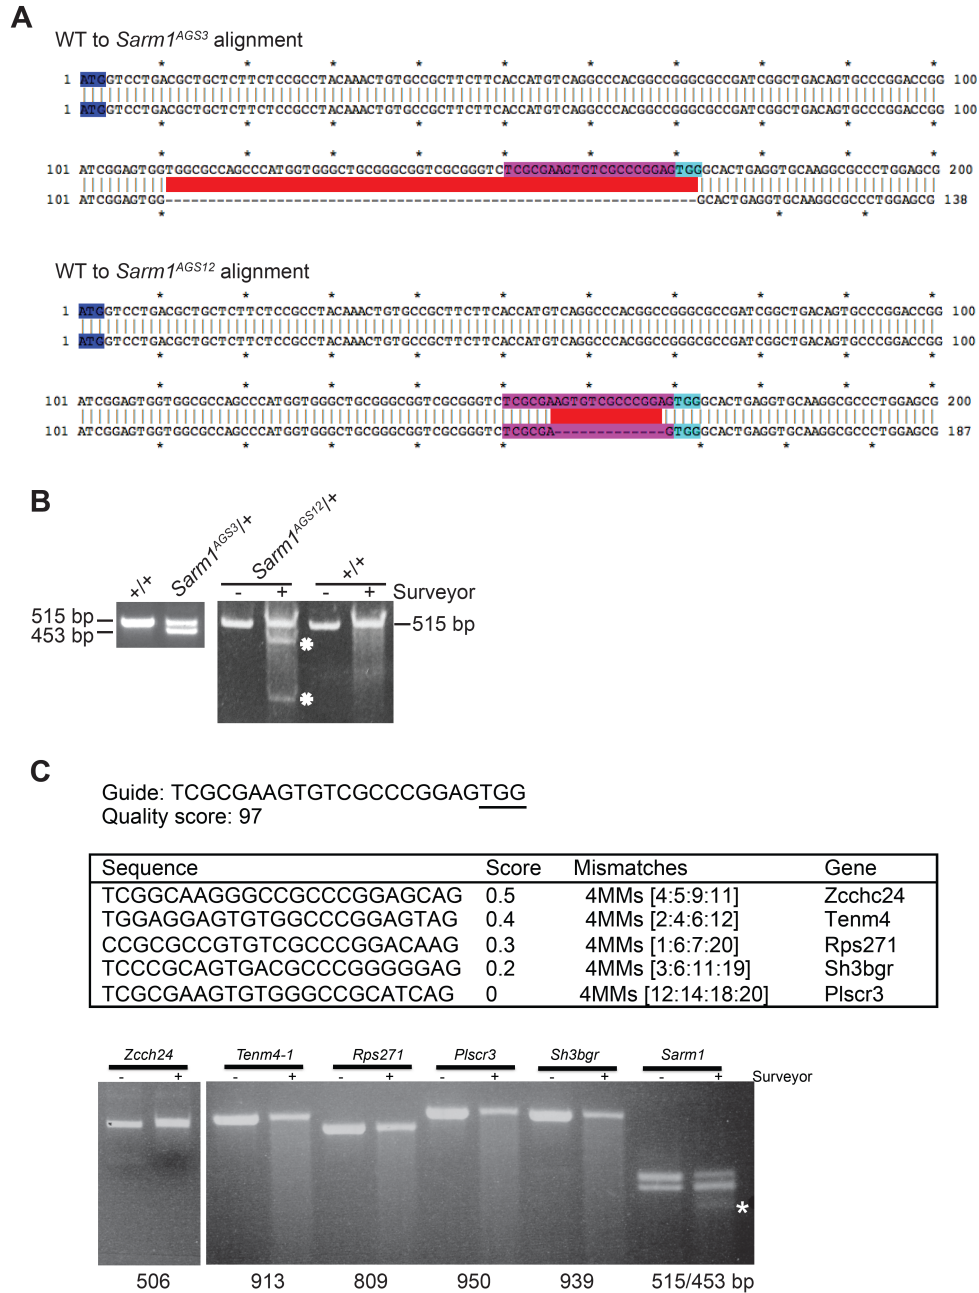

(A) Sequence alignment of WT and *Sarm1*<sup>AGS3</sup>, and WT and *Sarm1*<sup>AGS12</sup> alleles. The start codon is indicated in blue, the guide sequence in pink, and the PAM sequence in cyan. (B) WT or *Sarm1*<sup>AGS3/+</sup> genomic DNA was amplified by PCR and run on an agarose gel (left). WT or *Sarm1*<sup>AGS12/+</sup> genomic DNA was amplified by PCR, digested with Surveyor Nuclease, and run on a TBE gel (right). (C) Genes with off-target cleavage sites in exonic regions were amplified by PCR of genomic DNA from a cross of the *Sarm1*<sup>AGS3</sup> founder mouse to WT (*Sarm1*<sup>AGS3/+</sup>), digested with Surveyor nuclease, and run on agarose gels. Sizes of PCR products are listed below the gel. The *Sarm1* locus served as a positive control for Surveyor cleavage. Note both the *Sarm1*<sup>AGS3</sup> and the *Sarm1*<sup>AGS12</sup> alleles resulted from the same mosaic founder mouse.

**Figure S3. Specificity of XAF1 antibody and XAF1 overexpression, Related to Figure 6.**

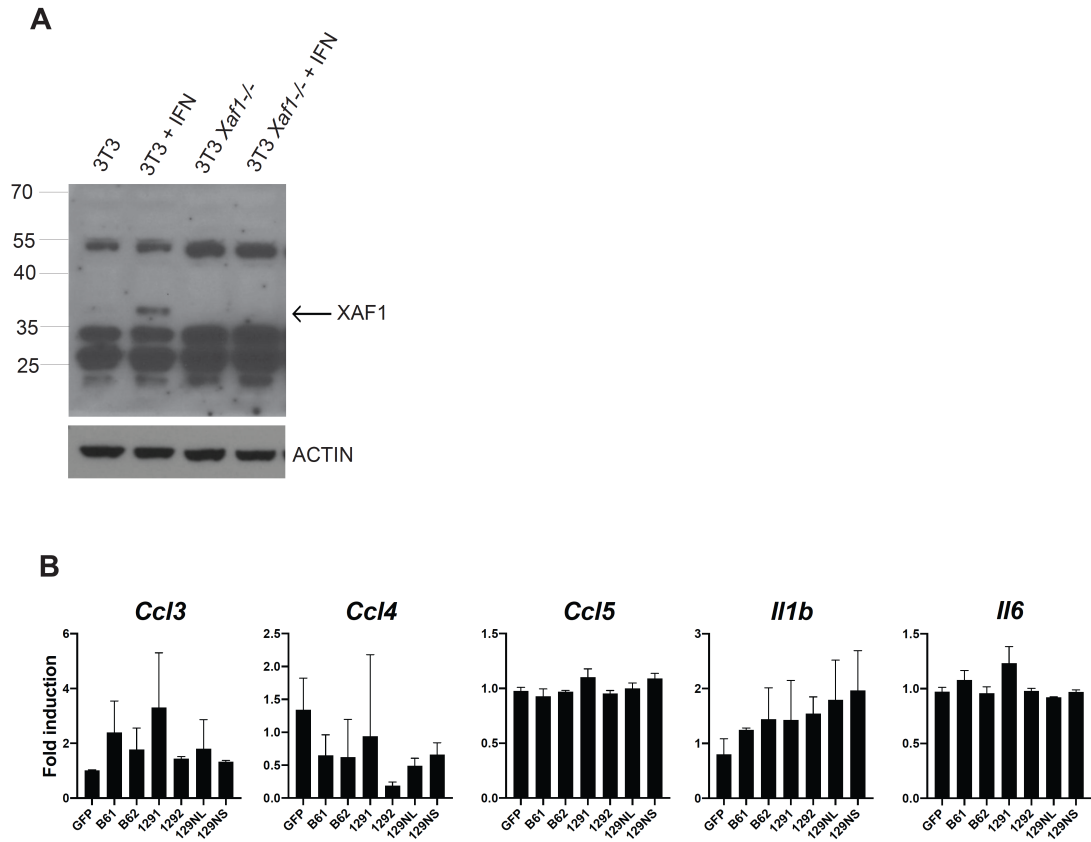

(A) 3T3 and 3T3 *Xaf1*<sup>-/-</sup> cells were mock treated, or treated with 1000 U universal type I IFN for 24 hrs. before western blotting for XAF1. (B) Neuro2A cells were transfected with the indicated XAF1 isoforms and cytokine/chemokine induction was determined by qPCR at 24 hrs. Data is normalized to 18S and expressed as fold induction relative to GFP control.

Table S1. *Sarm1* Alleles, Related to Figure 4.

| Allele                       | Deletion (bp) | Nucleotide position | Protein length (aa) |
|------------------------------|---------------|---------------------|---------------------|
| WT                           | -             | -                   | 764                 |
| <i>Sarm1</i> <sup>AGS3</sup> | $\Delta 62$   | +111 to +172        | 38                  |
| <i>Sarm1</i> <sup>AGS3</sup> | $\Delta 13$   | +156 to +168        | 74                  |

Table S2. SNP analysis of *Sarm1<sup>AD</sup>* and *Sarm1<sup>MSD</sup>* mice, Related to Figure 5.

| SNP# | Chromosome | NCBI Assembly bp | B6J | <i>Sarm1<sup>-/-</sup></i> | <i>Sarm1<sup>-/-MSD</sup></i> |
|------|------------|------------------|-----|----------------------------|-------------------------------|
| 11   | 01-11      | 75525463         | V V |                            | F F                           |
| 21   | 01-21      | 144953207        | F F |                            | V V                           |
| 115  | 05-15      | 104143745        | V V |                            | V F                           |
| 180  | 08-14      | 88318808         | F F |                            | V V                           |
| 205  | 10-01      | 7775347          | F F |                            | V F                           |
| 207  | 10-03      | 20325683         | F F |                            | V F                           |
| 209  | 10-05      | 38965551         | V V |                            | V F                           |
| 211  | 10-07      | 48685723         | F F |                            | V F                           |
| 213  | 10-09      | 67238174         | F F | V F                        | V V                           |
| 225  | 11-01      | 9552730          | F F |                            | V F                           |
| 229  | 11-05      | 37252460         | V V |                            | F F                           |
| 230  | 11-06      | 45819381         | F F |                            | V V                           |
| 231  | 11-07      | 54267162         | V V |                            | F F                           |
| 233  | 11-09      | 65095597         | V V |                            | F F                           |
| 235  | 11-11      | 75647055         | F F | V V                        | V V                           |
| 248  | 12-06      | 34055903         | F F |                            | V F                           |
| 260  | 12-18      | 114730692        | F F |                            | V F                           |
| 275  | 13-15      | 102573089        | F F |                            | V F                           |
| 277  | 13-17      | 115537300        | F F |                            | V F                           |
| 290  | 14-12      | 86216087         | V V |                            | V F                           |
| 292  | 14-14      | 101001947        | V V |                            | V F                           |
| 297  | 15-01      | 10575512         | F F |                            | V F                           |
| 299  | 15-03      | 22519205         | F F |                            | V F                           |
| 301  | 15-05      | 35126500         | F F |                            | V V                           |
| 329  | 17-03      | 23972821         | F F |                            | V F                           |
| 331  | 17-05      | 33380773         | F F |                            | V F                           |
| 349  | 18-09      | 58557879         | F F |                            | V F                           |
| 356  | 19-02      | 17770192         | F F |                            | V F                           |
| 362  | 19-08      | 59241076         | V V |                            | V F                           |

F=FAM probe  
V=VIC probe

Table S3. *Xaf1* Transcripts, Related to Figure 6.

| Transcript       | Size (bp) | Size (aa) | Size (kDa) | Accension                 |
|------------------|-----------|-----------|------------|---------------------------|
| B6 transcript 1  | 822       | 273       | 31         | ENSMUST00000146233.7      |
| 129 transcript 1 | 813       | 270       | 30         | MGP_129S1SvImJ_T0030476.1 |
| B6 transcript 2  | 537       | 178       | 20         | ENSMUST00000140842.8      |
| 129 transcript 2 | 528       | 175       | 20         | MN366017                  |
| 129 novel long   | 600       | 199       | 23         | MN366018                  |
| 129 novel short  | 315       | 104       | 12         | MN366019                  |

Table S4. Differentially expressed transcripts between WT and *Sarm1*<sup>AGS3</sup>, Related to figure 6.

| Gene symbol             | Gene name                                               | Log2 Fold Change |
|-------------------------|---------------------------------------------------------|------------------|
| <b>Mock infected</b>    |                                                         |                  |
| Atp5k                   | ATP synthase, subunit E (complex V)                     | 0.702            |
| Ndufa3                  | NADH: ubiquinone oxidoreductase, subunit A3 (complex I) | 0.671            |
| Ndufb3                  | NADH: ubiquinone oxidoreductase, subunit B3 (complex I) | 0.591            |
| Uqcrrh                  | Cytochrome b-c1, subunit 6 (complex III)                | 0.365            |
| Rpl38                   | Ribosomal protein L38                                   | 0.947            |
| Rps29                   | Ribosomal protein S29                                   | 0.891            |
| Rpl36a                  | Ribosomal protein L36a                                  | 0.633            |
| Rps21                   | Ribosomal protein S21                                   | 0.624            |
| Rpl37                   | Ribosomal protein L37                                   | 0.583            |
| Rpl23                   | Ribosomal protein L23                                   | 0.551            |
| Rpl5                    | Ribosomal protein L5                                    | 0.339            |
| Rpl9                    | Ribosomal protein L9                                    | 0.316            |
| Aatk                    | Apoptosis-associated tyrosine kinase                    | -0.286           |
| Metrn                   | Meteorin, glial cell differentiation regulator          | -0.351           |
| Nbl1                    | Neuroblastoma, suppression of tumorigenicity            | -0.494           |
| Gabra6                  | GABA A receptor, subunit alpha 6                        | -1.27            |
| <b>WNV-KUN infected</b> |                                                         |                  |
| Rps29                   | Ribosomal protein S29                                   | 0.804            |
| Ifi27k2a                | Interferon-alpha inducible protein 27 like 2A           | 0.746            |
| Tfrc                    | Transferrin receptor                                    | -0.71            |
| Malat1                  | Metastasis associated lung adenocarcinoma transcript 1  | -0.722           |
| Tug1                    | Taurine up-regulated (lncRNA)                           | -0.735           |
| Srxn1                   | Sulfiredoxin 1                                          | -0.779           |
| Adcyap1                 | Adenylate cyclase activating peptide 1                  | -0.865           |
| Fndc9                   | Fibronectin type III domain containing 9                | -1.13            |
| Prl                     | Prolactin                                               | -1.38            |



Table S5. Primer sequences, Related to STAR methods.

|                                          | Forward primer             | Reverse primer                                              |
|------------------------------------------|----------------------------|-------------------------------------------------------------|
| <i>Sarm1</i> <sup>AGS3</sup> genotyping  | TCTCCGCCTACAACTGTGC        | GGATACCGTCTCCAACCACC                                        |
| <i>Sarm1</i> <sup>AGS12</sup> genotyping | GTCCTGACGCTGCTCTTCT        | TGTGACAGCCTGTTTTGCTC                                        |
| <i>18S</i> qRT-PCR                       | GTAACCCGTTGAACCCCAT        | CCATCCAATCGGTAGTAGCG                                        |
| <i>Ccl1</i> qRT-PCR                      | CCCCTGAAGTTTATCCAGTGTTACAG | GTTGAGGCGCAGCTTTCTCTAC                                      |
| <i>Ccl2</i> qRT-PCR                      | TTGACCCGTAATCTGAAGCTAAT    | TCACAGTCCGAGTCACACTAGTTTAC                                  |
| <i>Ccl3</i> qRT-PCR                      | TGCCCTTGCTGTTCTTCTCT       | GTGGAATCTTCCGGCTGTAG                                        |
| <i>Ccl4</i> qRT-PCR                      | AAGCTGCCGGGAGGTGTAAG       | TGTCTGCCCTCTCTCCCTCTTG                                      |
| <i>Ccl5</i> qRT-PCR                      | TGCCACGTCAAGGAGTATTTTC     | TCCTAGCTCATCTCCAATAGTTGATG                                  |
| <i>Ccl7</i> qRT-PCR                      | GGATCTCTGCCACGCTTCTG       | TCCTTCTGTAGCTCTTGAGATTCTC                                   |
| <i>Cxcl2</i> qRT-PCR                     | GTCCCTCAACGGAAGAACCAA      | ACTCTCAGACAGCGAGGCACAT                                      |
| <i>Cxcl3</i> qRT-PCR                     | CTGGGATTCACCTCAAGAACATC    | CAGGGTCAAGGCAAGCCTC                                         |
| <i>Cxcl9</i> qRT-PCR                     | ATTGTGTCTCAGAGATGGTCTAATG  | TGAAATCCCATGGTCTCGAAAG                                      |
| <i>Cxcl10</i> qRT-PCR                    | TTCACCATGTGCCATGCC         | GAAGTACGAGCCTGAGCTAGG                                       |
| <i>Cxcl11</i> qRT-PCR                    | AAAATGGCAGAGATCGAGAAAGC    | CAGGCACCTTTGTCGTTTATGAG                                     |
| <i>Il1b</i> qRT-PCR                      | TGTCTTGGCCGAGGACTAAGG      | TGGGCTGGACTGTTTCTAATGC                                      |
| <i>Il6</i> qRT-PCR                       | TGAGATCTACTCGGCAAACCTAGTG  | CTTCGTAGAGAACAACATAAGTCAGATACC                              |
| <i>Il10</i> qRT-PCR                      | GGGTTGCCAAGCCTTATCG        | TCTCACCCAGGGAATTCAAATG                                      |
| <i>Il12b</i> qRT-PCR                     | CCTAAGTTCATCATGACACCTTTGC  | CCAAGTGGAAATGCTAGAATATCTATGC                                |
| <i>Tnf</i> qRT-PCR                       | AGAAACACAAGATGCTGGGACAGT   | CCTTTGCAGAACTCAGGAATGG                                      |
| <i>Ifnγ</i> qRT-PCR                      | TGCTGATGGGAGGAGATGTCTAC    | TTTCTTTCAGGGACAGCCTGTTAC                                    |
| <i>Ifnb1</i> qRT-PCR                     | CACAGCCCTCTCCATCAACTA      | CATTTCCGAATGTTCTGCTCCT                                      |
| <i>Sarm1</i> qRT-PCR                     | TCGCAATTTTGTCTGGTG         | AGCTTAAAGCAGTCACAATCTCC                                     |
| <i>Zcch24</i> Surveyor                   | GCTGTCTGCCATCGACACGA       | CTGCTTACTAGGAGCAGGGCT                                       |
| <i>Tenm4-1</i> Surveyor                  | ATAAGCCTGGGGCCTAGTGA       | TACTGCAGCGTTACCAAGG                                         |
| <i>Rps271</i> Surveyor                   | TATTGTTCCGTGTGTCCCCC       | GAACCCCTTTGTCGTTTGGC                                        |
| <i>Plscr3</i> Surveyor                   | GCCCGTCAGCTAGGATTAGG       | TTGCTTCAGGAGGGAACGTC                                        |
| <i>Sh3bgr</i> Surveyor                   | AGCTGGTGGAAAGGAGAAAGC      | AGGAGCATGAAACACTCCCC                                        |
| <i>Ccl5</i> SNP PCR                      | GCCAGGTGATGTAGCAGACA       | CCACAACCTGGCCTTTTCAGT                                       |
| <i>Xaf1</i> genotyping                   | GAACCCACACAGGGGTACAG       | TCAGGCGGAGGACAGGAATA                                        |
| <i>Xaf1</i> cloning                      | ATGGAGGCTGACTTCCAAGTGT     | TCACCAGCCCCACTGGAGTTT (B6)<br>TCACTGGAGTTTCTTTTGGTGAG (129) |
